# Supplementary material
Source: MDPI journal article supplement (https://www.mdpi.com/1996-1073/10/6/773)
Supplement: s1 [file s1]

We have complied with most of the reviewers' comments. In some cases we are doubtful about their suggestion. Hereafter the detail of our corrections and comments:

- According to rev. #1 and #2, tables 2 to 4 have been corrected: many errors due to incorrect "paste" were present ...
- Rev. # 1 requires inversion of contours and final table of summarizing results : this was made
- Rev # 1 asks if turbomachinery maps were included in the software. This is fully explained in the text. Compressor and turbine data are derived from technical literature and introduced as additional inputs in the turbine data set. Such data return performance levels close to the manufacturer's indications
- Rev # 2. Asks about TIT of 1200 K ?? Actually, the manufacturer indicates 1173 K TIT at base rating and this value is correctly returned by calculations
- The choice of vernal equinox is now explained.
- The ambient temperatures are now reported in table 7
- Rev # 2 does not agree with the maximum temperature of DOWTHERM A: the 427.6 °C is the datum provided by the THERMOFLEX software.
- Rev # 1 observes some inconsistencies between data in table 1 and 3: these are now explained in the text.

Finally, we have disregarded two suggestions of the REV #1:

- 1) We believe that the comparison with the ORC integrated system is useful in order to provide a comparison between two different levels of solar integration: the first one (with parabolic collectors) is at medium temperature, while the second one (with solar tower) operates at higher temperatures and improved results are observed in terms of energy saving, in despite of a lower flexibility to variable thermal and electrical demand
- 2) Similarly, referring to a biogas as an alternative fuel provides a significant example of plant operation with a full adoption of renewable energy sources. In addition, different levels of CO and unburned CH<sub>4</sub> are observed and this indicates that attention should be paid to a correct combustion development in this case

For the above reasons and to the sake of completeness of our work, we have decided to leave these items in our article.
